# Supplementary material
Source: PubMed Central journal article supplement (PMC7839060)
Supplement: NIHMS1611188-supplement-Supplemental.pdf [file NIHMS1611188-supplement-Supplemental.pdf]

**Supplementary Material**

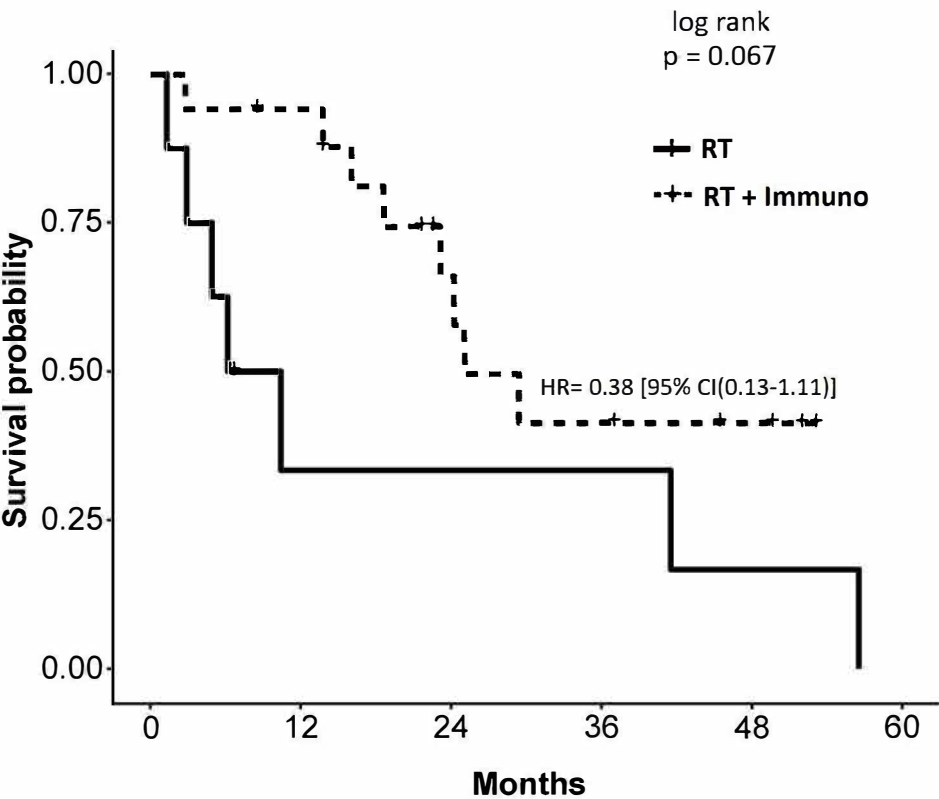

|             | 0  | 12 | 24 | 36 | 48 | 60 |
|-------------|----|----|----|----|----|----|
| RT          | 8  | 2  | 2  | 2  | 1  | 0  |
| RT + Immuno | 17 | 15 | 8  | 5  | 3  | 0  |

Months

**Fig S1.** Impact of timing. Kaplan-Meier curve of patients with melanoma brain metastases (MBM) who received radiation therapy (RT) ('no' group; solid line, n=8) or RT and immunotherapy ('yes' group; broken line, n=17) (Log rank p-value, 0.067) (Source file for Table 1). Hazard ratios based on Cox proportionality hazards models are reported as: hazard ratio (95% CI): HR for 'yes' vs 'no' group 0.38 (0.13-1.11), type 3 p-value= 0.078, log rank p-value = 0.067.

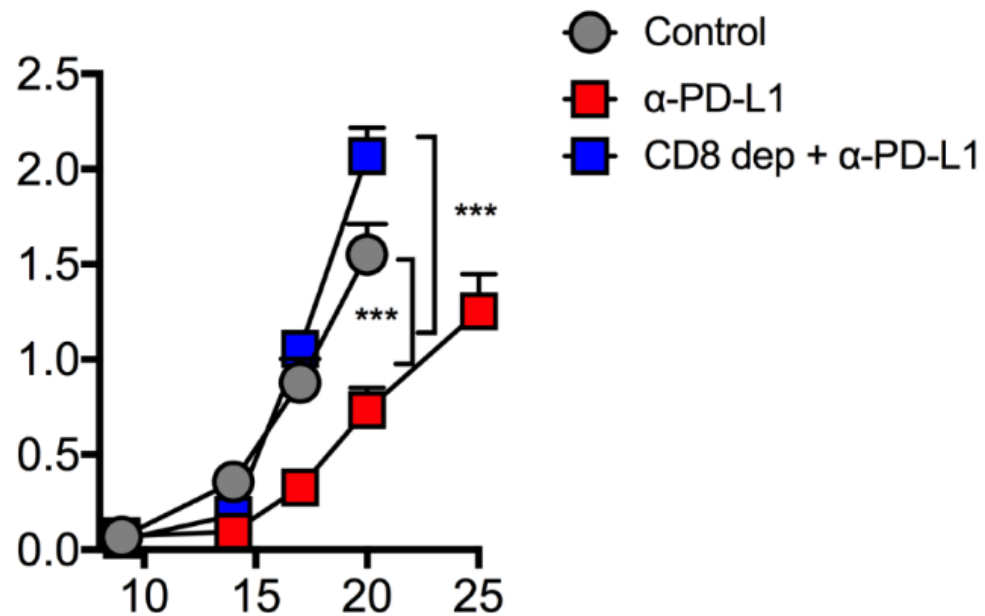

**Fig. S2.** Antibody depletion and drug treatment. Mice were injected with 500  $\mu$ g of  $\alpha$ -CD8 (clone 2.43) for depletion of CD8 T cells, one day before irradiation and one day after radiation and weekly thereafter.  $\alpha$ -PD-L1 (200  $\mu$ g; clone 29F.1A12) antibody in phosphate buffer saline (500  $\mu$ L) was injected i.p. every third day. Each error bar is  $\pm$  standard error of the mean.

**Table S1.** Annotation/pathway enrichment analysis using MetaCore of differentially expressed genes between treatment groups.

| #  | Maps                                                                                                            | Total | pValue    | Min FDR   | p-value   | FDR       | In Data | Network Objects from Active Data |
|----|-----------------------------------------------------------------------------------------------------------------|-------|-----------|-----------|-----------|-----------|---------|----------------------------------|
| 1  | <a href="#">Stellate cells activation and liver fibrosis</a>                                                    | 70    | 8.795E-05 | 1.038E-02 | 8.795E-05 | 1.038E-02 | 3       | RIPK1, DAB2, NIK(MAP3K14)        |
| 2  | <a href="#">Apoptosis and survival Anti-apoptotic TNFs/NF-kB/IAP pathway</a>                                    | 27    | 5.259E-04 | 2.390E-02 | 5.259E-04 | 2.390E-02 | 2       | RIPK1, NIK(MAP3K14)              |
| 3  | <a href="#">Activation of ACTH production in pituitary gland in major depressive disorder</a>                   | 32    | 7.404E-04 | 2.390E-02 | 7.404E-04 | 2.390E-02 | 2       | RIPK1, NIK(MAP3K14)              |
| 4  | <a href="#">Signal transduction PTMs (phosphorylation) in TNF-alpha-induced NF-kB signaling</a>                 | 41    | 1.216E-03 | 2.390E-02 | 1.216E-03 | 2.390E-02 | 2       | RIPK1, NIK(MAP3K14)              |
| 5  | <a href="#">Signal transduction PTMs (phosphorylation and acetylation) in TNF-alpha-induced NF-kB signaling</a> | 41    | 1.216E-03 | 2.390E-02 | 1.216E-03 | 2.390E-02 | 2       | RIPK1, NIK(MAP3K14)              |
| 6  | <a href="#">Apoptosis and survival Anti-apoptotic TNFs/NF-kB/Bcl-2 pathway</a>                                  | 42    | 1.276E-03 | 2.390E-02 | 1.276E-03 | 2.390E-02 | 2       | RIPK1, NIK(MAP3K14)              |
| 7  | <a href="#">Immune response Inhibitory action of Lipoxins on pro-inflammatory TNF-alpha signaling</a>           | 46    | 1.529E-03 | 2.390E-02 | 1.529E-03 | 2.390E-02 | 2       | RIPK1, NIK(MAP3K14)              |
| 8  | <a href="#">Activation of TNF-alpha-dependent pro-tumoral effect in colorectal cancer</a>                       | 49    | 1.733E-03 | 2.390E-02 | 1.733E-03 | 2.390E-02 | 2       | RIPK1, NIK(MAP3K14)              |
| 9  | <a href="#">Signal transduction NF-kB activation pathways</a>                                                   | 51    | 1.877E-03 | 2.390E-02 | 1.877E-03 | 2.390E-02 | 2       | RIPK1, NIK(MAP3K14)              |
| 10 | <a href="#">TLRs-mediated IFN-alpha production by plasmacytoid dendritic cells in SLE</a>                       | 53    | 2.025E-03 | 2.390E-02 | 2.025E-03 | 2.390E-02 | 2       | NIK(MAP3K14), CDC37              |
| 11 | <a href="#">Immune response T regulatory cell-mediated modulation of antigen-presenting cell functions</a>      | 66    | 3.122E-03 | 3.349E-02 | 3.122E-03 | 3.349E-02 | 2       | DAB2, NIK(MAP3K14)               |
| 12 | <a href="#">Immune response OX40L/ OX40 signaling pathway</a>                                                   | 69    | 3.407E-03 | 3.351E-02 | 3.407E-03 | 3.351E-02 | 2       | RIPK1, NIK(MAP3K14)              |
| 13 | <a href="#">T follicular helper cell dysfunction in SLE</a>                                                     | 90    | 5.728E-03 | 5.199E-02 | 5.728E-03 | 5.199E-02 | 2       | RIPK1, NIK(MAP3K14)              |
| 14 | <a href="#">Stem cells CD30 signaling in transformed embryonic stem cells</a>                                   | 18    | 2.278E-02 | 9.324E-02 | 2.278E-02 | 9.324E-02 | 1       | NIK(MAP3K14)                     |
| 15 | <a href="#">Development Degradation of beta-catenin in the absence of WNT signaling</a>                         | 19    | 2.404E-02 | 9.324E-02 | 2.404E-02 | 9.324E-02 | 1       | DAB2                             |
| 16 | <a href="#">DNA damage Inhibition of telomerase activity and cellular senescence</a>                            | 20    | 2.529E-02 | 9.324E-02 | 2.529E-02 | 9.324E-02 | 1       | TEP1                             |
| 17 | <a href="#">Stem cells Putative pathways of telomerase regulation in glioblastoma stem cells</a>                | 20    | 2.529E-02 | 9.324E-02 | 2.529E-02 | 9.324E-02 | 1       | TEP1                             |
| 18 | <a href="#">wtCFTR and deltaF508-CFTR traffic / Clathrin coated vesicles formation (normal and CF)</a>          | 20    | 2.529E-02 | 9.324E-02 | 2.529E-02 | 9.324E-02 | 1       | DAB2                             |
| 19 | <a href="#">Cell cycle Chromosome condensation in prometaphase</a>                                              | 21    | 2.653E-02 | 9.324E-02 | 2.653E-02 | 9.324E-02 | 1       | INCENP                           |
| 20 | <a href="#">wtCFTR traffic / Sorting endosome formation (normal)</a>                                            | 22    | 2.778E-02 | 9.324E-02 | 2.778E-02 | 9.324E-02 | 1       | DAB2                             |
| 21 | <a href="#">Stem cells Aberrant Wnt signaling in medulloblastoma stem cells</a>                                 | 23    | 2.903E-02 | 9.324E-02 | 2.903E-02 | 9.324E-02 | 1       | DAB2                             |
| 22 | <a href="#">Development Cross-talk between VEGF and Angiopoietin 1 signaling pathways</a>                       | 25    | 3.151E-02 | 9.324E-02 | 3.151E-02 | 9.324E-02 | 1       | RIPK1                            |
| 23 | <a href="#">Transcription Transcription regulation of aminoacid metabolism</a>                                  | 25    | 3.151E-02 | 9.324E-02 | 3.151E-02 | 9.324E-02 | 1       | MAFG                             |
| 24 | <a href="#">A proinflammatory phenotype of senescent alveolar epithelial cells in COPD</a>                      | 25    | 3.151E-02 | 9.324E-02 | 3.151E-02 | 9.324E-02 | 1       | NIK(MAP3K14)                     |
| 25 | <a href="#">Role of keratinocytes and Langerhans cells in skin sensitization</a>                                | 25    | 3.151E-02 | 9.324E-02 | 3.151E-02 | 9.324E-02 | 1       | NIK(MAP3K14)                     |
| 26 | <a href="#">Hedgehog signaling in prostate cancer</a>                                                           | 26    | 3.275E-02 | 9.324E-02 | 3.275E-02 | 9.324E-02 | 1       | CDC37                            |
| 27 | <a href="#">Neurophysiological process Sweet taste signaling</a>                                                | 27    | 3.399E-02 | 9.324E-02 | 3.399E-02 | 9.324E-02 | 1       | Pannexin-1                       |
| 28 | <a href="#">Activation of TGF-beta signaling in pancreatic cancer</a>                                           | 27    | 3.399E-02 | 9.324E-02 | 3.399E-02 | 9.324E-02 | 1       | DAB2                             |
| 29 | <a href="#">DeltaF508-CFTR traffic / Sorting endosome formation in CF</a>                                       | 27    | 3.399E-02 | 9.324E-02 | 3.399E-02 | 9.324E-02 | 1       | DAB2                             |
| 30 | <a href="#">Immune response Innate immune response to RNA viral infection</a>                                   | 28    | 3.523E-02 | 9.324E-02 | 3.523E-02 | 9.324E-02 | 1       | RIPK1                            |
| 31 | <a href="#">Signal transduction PTMs in IL-17-induced CIKS-dependent NF-kB signaling and mRNA stabilization</a> | 28    | 3.523E-02 | 9.324E-02 | 3.523E-02 | 9.324E-02 | 1       | NIK(MAP3K14)                     |
| 32 | <a href="#">Neurophysiological process Bitter taste signaling</a>                                               | 28    | 3.523E-02 | 9.324E-02 | 3.523E-02 | 9.324E-02 | 1       | Pannexin-1                       |
| 33 | <a href="#">Immune response CD137 signaling in immune cell</a>                                                  | 29    | 3.647E-02 | 9.324E-02 | 3.647E-02 | 9.324E-02 | 1       | NIK(MAP3K14)                     |
| 34 | <a href="#">Cholesterol and Sphingolipid transport / Influx to the early endosome in lung (normal and CF)</a>   | 29    | 3.647E-02 | 9.324E-02 | 3.647E-02 | 9.324E-02 | 1       | DAB2                             |
| 35 | <a href="#">Signal transduction Additional pathways of NF-kB activation (in the nucleus)</a>                    | 30    | 3.770E-02 | 9.324E-02 | 3.770E-02 | 9.324E-02 | 1       | NIK(MAP3K14)                     |
| 36 | <a href="#">IL-1 beta-dependent CFTR expression</a>                                                             | 31    | 3.894E-02 | 9.324E-02 | 3.894E-02 | 9.324E-02 | 1       | NIK(MAP3K14)                     |
| 37 | <a href="#">Signal transduction PTMs in BAFF-induced non-canonical NF-kB signaling</a>                          | 32    | 4.017E-02 | 9.324E-02 | 4.017E-02 | 9.324E-02 | 1       | NIK(MAP3K14)                     |
| 38 | <a href="#">The role of KEAP1/NRF2 pathway in skin sensitization</a>                                            | 32    | 4.017E-02 | 9.324E-02 | 4.017E-02 | 9.324E-02 | 1       | MAFG                             |
| 39 | <a href="#">Immune response TLR3 and TLR4 induced TICAM1-specific signaling pathway</a>                         | 33    | 4.140E-02 | 9.324E-02 | 4.140E-02 | 9.324E-02 | 1       | RIPK1                            |
| 40 | <a href="#">The innate immune response to contact allergens</a>                                                 | 33    | 4.140E-02 | 9.324E-02 | 4.140E-02 | 9.324E-02 | 1       | Pannexin-1                       |
| 41 | <a href="#">Role of Apo-2L(TNFSF10) in Prostate Cancer cell apoptosis</a>                                       | 34    | 4.263E-02 | 9.324E-02 | 4.263E-02 | 9.324E-02 | 1       | RIPK1                            |
| 42 | <a href="#">Apoptosis and survival Caspase cascade</a>                                                          | 34    | 4.263E-02 | 9.324E-02 | 4.263E-02 | 9.324E-02 | 1       | RIPK1                            |
| 43 | <a href="#">Development Angiopoietin - Tie2 signaling</a>                                                       | 35    | 4.386E-02 | 9.324E-02 | 4.386E-02 | 9.324E-02 | 1       | RIPK1                            |
| 44 | <a href="#">NF-kB pathway in multiple myeloma</a>                                                               | 35    | 4.386E-02 | 9.324E-02 | 4.386E-02 | 9.324E-02 | 1       | NIK(MAP3K14)                     |
| 45 | <a href="#">Immune response Inflammasome in inflammatory response</a>                                           | 35    | 4.386E-02 | 9.324E-02 | 4.386E-02 | 9.324E-02 | 1       | Pannexin-1                       |
| 46 | <a href="#">Development Regulation of telomere length and cellular immortalization</a>                          | 35    | 4.386E-02 | 9.324E-02 | 4.386E-02 | 9.324E-02 | 1       | TEP1                             |
| 47 | <a href="#">Extracellular matrix-regulated proliferation of airway smooth muscle cells in asthma</a>            | 35    | 4.386E-02 | 9.324E-02 | 4.386E-02 | 9.324E-02 | 1       | DAB2                             |
| 48 | <a href="#">Immune response Lipoxins and Resolvin E1 inhibitory action on neutrophil functions</a>              | 35    | 4.386E-02 | 9.324E-02 | 4.386E-02 | 9.324E-02 | 1       | NIK(MAP3K14)                     |
| 49 | <a href="#">Immune response IL-12-induced IFN-gamma production</a>                                              | 36    | 4.508E-02 | 9.324E-02 | 4.508E-02 | 9.324E-02 | 1       | NIK(MAP3K14)                     |
| 50 | <a href="#">Cell cycle The metaphase checkpoint</a>                                                             | 36    | 4.508E-02 | 9.324E-02 | 4.508E-02 | 9.324E-02 | 1       | INCENP                           |
